# Supplementary material for: Childhood socioeconomic position and adult leisure-time physical activity: a systematic review protocol
Source: PubMed Central journal article supplement (PMC4265411; doi:10.1186/2046-4053-3-141), 2014-12-05
Supplement: 13643_2014_308_MOESM1_ESM.pdf [file 13643_2014_308_MOESM1_ESM.pdf]

| A. Reference details                         |         |  |    |  |
|----------------------------------------------|---------|--|----|--|
| A1. Reference Manager ID number (Ref ID)     |         |  |    |  |
| A2. 1 <sup>st</sup> Author                   |         |  |    |  |
| A3. Title of paper                           |         |  |    |  |
| A4. Journal, volume, year of publication     |         |  |    |  |
| A8. Assessor's name, date of assessment      |         |  |    |  |
| B. Eligibility                               |         |  |    |  |
| B1. Study included in systematic review?     | Yes     |  | No |  |
| C. Reason(s) for exclusion (if excluded)     |         |  |    |  |
| C1. Outcome not in adults ( $\geq$ 25 yrs.)  | Yes     |  | No |  |
| C2. Ineligible exposure                      | Yes     |  | No |  |
| C3. Ineligible outcome                       | Yes     |  | No |  |
| C4. Review article                           | Yes     |  | No |  |
| C5. Duplicate (Insert Ref ID of other study) | Yes     |  | No |  |
|                                              | Ref ID: |  |    |  |
| C6. Other                                    |         |  |    |  |
