# Supplementary material for: Childhood socioeconomic position and adult leisure-time physical activity: a systematic review protocol
Source: PubMed Central journal article supplement (PMC4265411; doi:10.1186/2046-4053-3-141), 2014-12-05
Supplement: 13643_2014_308_MOESM2_ESM.pdf [file 13643_2014_308_MOESM2_ESM.pdf]

| A. Reference details                                         |                 |                                                                      |                      |                     |                                  |
|--------------------------------------------------------------|-----------------|----------------------------------------------------------------------|----------------------|---------------------|----------------------------------|
| A1. Ref ID, 1 <sup>st</sup> author, title, publication year, |                 |                                                                      |                      |                     |                                  |
| A2. Assessor's name and date of assessment                   |                 |                                                                      |                      |                     |                                  |
| B. Study details                                             |                 |                                                                      |                      |                     |                                  |
| B1. Name of study/cohort                                     |                 |                                                                      |                      |                     |                                  |
| B2. Design                                                   |                 | Prospective cohort                                                   | Retrospective cohort | Case-control        | Other                            |
| B2A. If other:                                               |                 |                                                                      |                      |                     |                                  |
| B3. Country, setting                                         |                 |                                                                      |                      |                     |                                  |
| C. Childhood socioeconomic position                          |                 |                                                                      |                      |                     |                                  |
| C1. Parental occupation                                      |                 | Yes                                                                  |                      |                     | No                               |
| C2. Parental education                                       |                 | Yes                                                                  |                      |                     | No                               |
| C3. Other measures (list):                                   |                 |                                                                      |                      |                     |                                  |
| C4. How ascertained                                          |                 | Prospectively                                                        |                      | Retrospectively     |                                  |
| C5. Age recorded                                             |                 |                                                                      |                      |                     |                                  |
| C6. Age referred to                                          |                 |                                                                      |                      |                     |                                  |
| D. Physical activity (PA) outcomes                           |                 |                                                                      |                      |                     |                                  |
| D1. Parameters measured                                      |                 | Frequency                                                            | Type                 | Duration            | Intensity                        |
| D2. Type of leisure-time PA (LTPA) measured                  |                 | Sport/exercise                                                       | Gardening/DIY        | Total LTPA          | Other                            |
| D2A. If other please describe                                |                 |                                                                      |                      |                     |                                  |
| D3. How ascertained                                          |                 | Self-reported                                                        |                      | Objective methods   |                                  |
| D4. Age ascertained                                          |                 |                                                                      |                      |                     |                                  |
| D5. Variable details                                         |                 | Binary                                                               | Ordinal              | Continuous          | Other                            |
| D5A. If other:                                               |                 |                                                                      |                      |                     |                                  |
| E. Available participant numbers                             |                 |                                                                      |                      |                     |                                  |
| E1. Baseline                                                 |                 | Yes                                                                  | No                   |                     | If yes, number                   |
| E2. Excluded                                                 |                 | Yes                                                                  | No                   |                     | If yes, number                   |
| E3. Refused                                                  |                 | Yes                                                                  | No                   |                     | If yes, number                   |
| E4. Lost to follow-up                                        |                 | Yes                                                                  | No                   |                     | If yes, number                   |
| E5. Other losses                                             |                 | Yes                                                                  | No                   |                     | If yes, number                   |
| E6. Included in analysis                                     |                 | Yes                                                                  | No                   |                     | If yes, number                   |
| E7. All accounted for                                        |                 | Yes                                                                  | No                   |                     |                                  |
| F. Analysis                                                  |                 |                                                                      |                      |                     |                                  |
| F1. How results analysed                                     |                 | Descriptive/Trend                                                    | Logistic regression  | Linear regression   | Other                            |
| F1A. If other:                                               |                 |                                                                      |                      |                     |                                  |
| F2. Included in analysis                                     |                 | Men and women                                                        | Men only             |                     | Women only                       |
| F3. Only significant results presented                       |                 | Yes                                                                  |                      |                     | No                               |
| G. Summary of results                                        |                 |                                                                      |                      |                     |                                  |
| G1. Prevalence/Mean difference                               |                 | Yes                                                                  |                      |                     | No                               |
| G2. Odds/Risk ratios                                         |                 | Yes                                                                  |                      |                     | No                               |
| G3. Regression coefficients                                  |                 | Yes                                                                  |                      |                     | No                               |
| G4. Confidence intervals (CIs)/ P-value/standard errors (SE) |                 | Yes                                                                  |                      |                     | No                               |
| G5. Other                                                    |                 | Yes                                                                  |                      |                     | No                               |
| G5A. If other:                                               |                 |                                                                      |                      |                     |                                  |
| H. References for screening                                  |                 |                                                                      |                      |                     |                                  |
| H1. Reference numbers                                        |                 |                                                                      |                      |                     |                                  |
| I. Effect estimates                                          |                 |                                                                      |                      |                     |                                  |
| Association tested                                           | Number analysed | Type of effect estimate and category comparison/value of unit change | Effect estimate      | 95% CI; SE; p-value | Confounders included in analysis |
| 1.                                                           |                 |                                                                      |                      |                     |                                  |
| 2.                                                           |                 |                                                                      |                      |                     |                                  |
