# Supplementary material for: Childhood socioeconomic position and adult leisure-time physical activity: a systematic review protocol
Source: PubMed Central journal article supplement (PMC4265411; doi:10.1186/2046-4053-3-141), 2014-12-05
Supplement: 13643_2014_308_MOESM3_ESM.pdf [file 13643_2014_308_MOESM3_ESM.pdf]

Note: A study can be awarded a maximum of two stars for each numbered item – (except number 5).

#### **A. Selection**

- 1) Representativeness of the exposed cohort
  - a) Truly representative of the source population. \* \*
  - b) Somewhat representative of the source population. \*
  - c) Selected group of users e.g. nurses, volunteers.
  - d) No description of the derivation of the cohort.
- 2) Ascertainment of childhood socioeconomic position (SEP)
  - a) Prospectively from parents/participants when aged  $\leq 18$  years. \* \*
  - b) Retrospectively collected with attempts to reduce recall bias (e.g. life-grid and structured interview techniques). \*
  - c) Retrospectively collected without attempts to reduce recall bias.
  - d) No description.

#### **B. Comparability**

- 3) Comparability of cohorts on the basis of the design/analysis
  - a) Study controls for adult SEP. \*
  - b) Study controls for any additional relevant factors (e.g. age, sex). \*
  - c) Only unadjusted model presented.

#### **C. Outcome**

- 4) Assessment of physical activity
  - a) Objective methods (heart-rate monitoring/accelerometer). \* \*
  - b) Self-reported using validated questionnaire/diary/interview. \*
  - c) Self-report.
  - d) No description.
- 5) Adequacy of cohort follow-up
  - a) Complete follow up - all subjects accounted for. \*
  - b) Subjects lost to follow up unlikely to introduce bias ( $\geq 75\%$  follow-up or description provided of those lost). \*
  - c)  $< 75\%$  follow-up and no description of those lost.
  - d) No statement.
